# Supplementary material for: The potential energy surface of isomerising disilyne
Source: Royal Society of Chemistry journal article supplement (doi:10.1039/c2cp40605e), 2012-01-01
Supplement: c2cp40605e.zip [file c2cp40605e.zip]

The file si2h2-pot.f is the FORTRAN source code for the fitted Si2H2 potential energy surface reported in

M. M. Law, J. T. Fraser-Smith and C. U. Perotto,  
Phys. Chem. Chem. Phys. (2012)

The user must supply as an argument to the subroutine SI2H2POT an array of 6 internuclear distances (in units of angstroms); the potential energy is returned in cm<sup>-1</sup> units.

The elements of the R array are numbered such that

```
R(1)=D13  
R(2)=D24  
R(3)=D34  
R(4)=D14  
R(5)=D23  
R(6)=D12
```

where D<sub>ij</sub> is the internuclear distance between atoms i and j, numbered as follows:

H1, H2, Si3, Si4.

Note that the energy of the dibridged minimum on this surface is +1.6 cm<sup>-1</sup>.

Also supplied is a file si2h2-test.f which is the source code for a test main program; compile using (something like):

```
f77 -o si2h2-test si2h2-test.f si2h2-pot.f
```

si2h2-test.data contains the six internuclear distances for each of the four isomers and the dibridged-monobridged transition state.
